# Supplementary material
Source: publisher site journal article supplement (https://www.dovepress.com/get_supplementary_file.php?f=356488.docx)
Supplement: Supplementary file 1 [file get_supplementary_file.php]

In supplement Figure 1A-1C, Compare the cfPWV between different age in quartile. The results showed older subjects had higher cfPWV and higher proportion of AS.


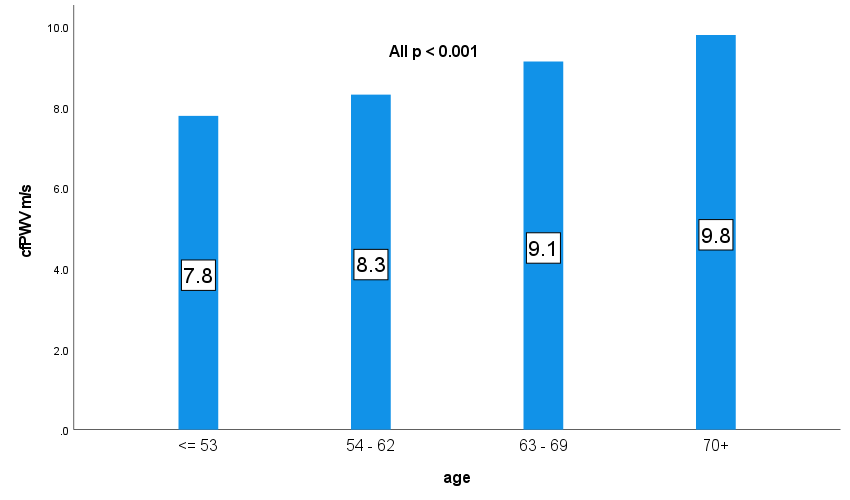


**1A**A


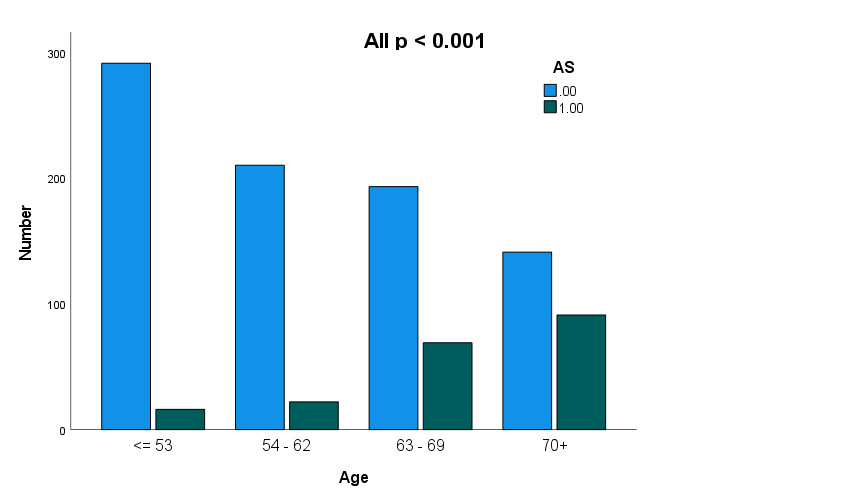


**1B**A

Supplement Figure 1A and 1B the cfPWV and number of AS between different age in quartile. P < 0.001 for comparison between any two groups.


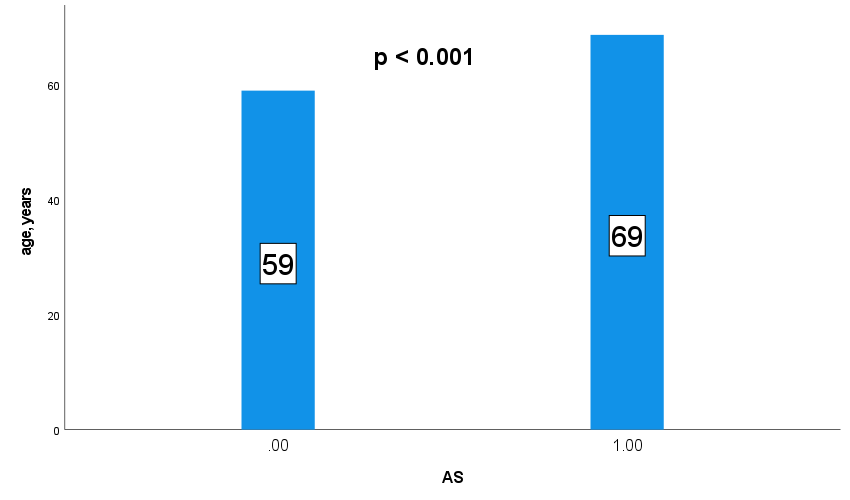


**1C**A

Supplement Figure 1C the subjects with AS were older than those with no AS.
